# Supplementary material for: A novel signal self-enhancement photoelectrochemical immunosensor without addition of a sacrificial agent in solution based on Ag2S/CuS/α-Fe2O3 n–p–n heterostructure films
Source: Royal Society of Chemistry journal article supplement (doi:10.1039/c9cc09721j), 2020-01-01
Supplement: c9cc09721j1.pdf [file c9cc09721j1.pdf]

*Supporting Information for*

**A New Signal Self-enhancement Photoelectrochemical Immunosensor  
without Addition Sacrificial Agent in Solution Based on Ag<sub>2</sub>S/CuS/ $\alpha$ -  
Fe<sub>2</sub>O<sub>3</sub> n-p-n Heterostructure Films**

Min Chen, Cun Wang, Fangjing Mo, Hui Meng, Yingzi Fu\*

Key Laboratory of Luminescent and Real-Time Analytical Chemistry (Southwest  
University), Ministry of Education, School of Chemistry and Chemical Engineering,  
Southwest University, Chongqing 400715, China

**List of Contents:** \_\_\_\_\_

\* Corresponding author: *Yingzi Fu*

Tel: +86-023-68252277

E-mail address: [fyzc@swu.edu.cn](mailto:fyzc@swu.edu.cn)

- 1. Reagents and apparatus**
- 2. Solvothermal synthesis of  $\alpha$ -Fe<sub>2</sub>O<sub>3</sub> NPs**
- 3. Synthesis of CuS NPs**
- 4. Preparation of different Au NPs**
- 5. Fabrication of different Au NPs@Ab<sub>2</sub>**
- 6. Immunoreaction and measurement procedure**
- 7. EIS performances of the stepwise modified electrodes**
- 8. The elemental mappings of n-p-n composite**
- 9. FTIR and EDX Characteristics of different materials**
- 10. Band-gap determination of  $\alpha$ -Fe<sub>2</sub>O<sub>3</sub>, CuS and Ag<sub>2</sub>S**
- 11. Optimization experiments**
- 12. PEC signal of different sensors immune responses**
- 13. Selectivity of the PEC immunosensors**
- 14. Detection of PSA in diluted human serum samples**
- 15. Stability of the PEC immunosensor**
- 16. Comparison of various methods for PSA activity assay**
- 17. References**

## 1. Reagents and apparatus

Cupric nitrate ( $\text{Cu}(\text{NO}_3)_2$ , 99.99%), silver nitrate ( $\text{AgNO}_3$ , 99.99%), sodium sulfide nonahydrate ( $\text{Na}_2\text{S}\cdot 9\text{H}_2\text{O}$ , 99.99%), ferric trichloride ( $\text{FeCl}_3$ , 99.99%), KCl (99.5%) and thioglycollic acid (TGA) were bought from the Chemical Reagent Co. (Chongqing, China).  $\alpha$ -fetoprotein (AFP), carcinoembryonic antigen (CEA), prostate-specific antigen (PSA), prostate specific antibody (anti-PSA, unconjugated, designated as Ab1), N-Hydroxysuccinimide (NHS), 1-(3-Dimethylaminopropyl)-3-ethylcarbodiimide hydrochloride (EDC), L-cysteine (cys, 99%), Chloroauric acid ( $\text{HAuCl}_4\cdot 4\text{H}_2\text{O}$ , 99%), bovine serum albumin (BSA,  $\geq 98\%$ ), acetonitrile (99%), ferrocene (99%), ascorbic acid (AA, 99%), sodium citrate (99%), tetrabutylammonium hexafluorophosphate ( $\text{TBAPF}_6$ , 98%) were purchased from J&k Chemical Co. (Beijing, China). Phosphate buffer saline (PBS,  $0.1\text{ mol}\cdot\text{L}^{-1}$ ) at various pH values were prepared by mixing the different ratio stock solutions of  $\text{Na}_2\text{HPO}_4$  and  $\text{KH}_2\text{PO}_4$  containing  $0.1\text{ mol}\cdot\text{L}^{-1}$  KCl as supporting electrolyte.  $5\text{ mmol}\cdot\text{L}^{-1}$   $[\text{Fe}(\text{CN})_6]^{3-/4-}$  solution was composed of  $\text{K}_4\text{Fe}(\text{CN})_6$  and  $\text{K}_3\text{Fe}(\text{CN})_6$  ( $0.1\text{ mol}\cdot\text{L}^{-1}$  PBS, pH 7.4). Healthy human serum samples were obtained from the Ninth People's Hospital of Chongqing, China. All reagents were analytical grade and used as received without further purification. The experimental water was double distilled ( $18.2\text{ M}\Omega\cdot\text{cm}$ ).

Electrochemical measurements were performed on CHI 604D electrochemical workstation (Shanghai Chenhua Instruments Co., China), and PEC experiments were carried out at CHI 440A electrochemical workstation (Shanghai Chenhua Instruments Co., China) configured with PEAC 200A (Tianjin Ai Da Hengsheng Technology Co., Ltd., China) for visible-light irradiation. A three-electrode system was used to investigate the redox behaviors, which was composed of a glassy carbon electrode (GCE,  $\Phi = 4.0\text{ mm}$ ) as the working electrode, an Ag/AgCl (sat. KCl) as the reference electrode and a platinum

wire as the counter electrode. The UV-Vis spectra were recorded with a UV-2600 UV/Vis spectrophotometer (Shimadzu, Japan). Scanning electron microscopy (SEM) images and energy dispersive spectra (EDS) were acquired on a field emission SEM (ZEISS, Germany). The Fourier transform infrared spectra (FTIR) were obtained from Fourier Transform Infrared Spectrometer (PerkinElmer, USA). X-ray photoelectron spectroscopy (XPS) measurements were performed by an Axis Ultra spectrometer (Kratos Analytical Ltd., Japan) and the binding energy was calibrated by the O 1s peak at 532.4 eV and the C 1s peak at 284.8 eV. JEM 1200EX transmission electron microscopy (TEM, Tokyo, Japan) was applied to characterize the morphology and structure of the materials involved in this work. Electrochemical impedance spectroscopy (EIS) and Cyclic voltammetry (CV) measurements were carried out with a CHI 604 D electrochemistry workstation (Shanghai Chenhua Instruments Co, China) in 3.0 mL of 5 mmol·L<sup>-1</sup> [Fe(CN)<sub>6</sub>]<sup>3-/4-</sup>. All measurements were carried out at the room temperature 25.0 ± 0.5°C.

## **2. Solvothermal synthesis of $\alpha$ -Fe<sub>2</sub>O<sub>3</sub> NPs**

The  $\alpha$ -Fe<sub>2</sub>O<sub>3</sub> NPs were synthesized according to Reference 1. In a typical synthesis, 2.16 g FeCl<sub>3</sub>·6H<sub>2</sub>O was dissolved in 40 mL ethylene glycol with stirring for 40 min. 3.6 g sodium acetate and 0.5 g trisodium citrate were introduced into the solution at an interval of 20 min and vigorously mixed for 1 h. The homogenous solution was then transferred into a 100 mL Teflon lined autoclave and was placed at 180°C for 18 h. The resultant brown to black magnetic precipitate ( $\alpha$ -Fe<sub>2</sub>O<sub>3</sub>) was purified under external magnetic field using ethanol/Milli Q water.

## **3. Synthesis of CuS NPs**

The CuS NPs were prepared by the hydrothermal method according to Reference 2 with a slight modification. Initially, 145 mg L-cysteine was dissolved in 36 mL water, 3 mL CuCl<sub>2</sub> solution (0.1 mol·L<sup>-1</sup>) was dropwise added to the suspension over 20 min. Subsequently, the reaction solution was stirred for 30 min before it was transferred to a 50 mL Teflon-lined stainless steel autoclave and maintained at 160 °C for 12 h. The obtained product was washed three times with water and ethanol, and dried at 60 °C overnight.

#### 4. Preparation of different Au NPs

**Citrate–Au NPs** Briefly, according to Reference 3, 1 mL of 1 wt. % solution of HAuCl<sub>4</sub> was mixed with 99 mL of water. Then 2.5 mL 1 wt. % sodium citrate solution was added quickly under boiling and stirring. When the solution changed to wine red, the heat source was removed and stored at 4 °C after cooling to room temperature.

**SO<sub>3</sub><sup>2-</sup>-Au NPs** 300 μL of 0.1 % chlorauric acid solution was added in water to form 30 mL solution, while the solution was got boiling with heating reflux, 1 % L-cysteine 30 μL was quickly added, stirring vigorously and continuing to heat for 3 min, the solution was removed from heat, cooled to room temperature. At the beginning, the color of the solution changed from dark grey to purple red, and finally to pink, meaning the Au NPs coated by SO<sub>3</sub><sup>2-</sup> solution were obtained.

**Cysteine-Au NPs** Cysteine-coated Au NPs were obtained by ligand exchange in two ways. Firstly, 30 μL 1 % L-cysteine was added slowly into citrate–Au NPs solution, the color of the solution changed from wine red to purple, and the Au NPs capped by cysteine were obtained and recorded as Cys-Au NPs(i). Another kind of cysteine-Au NPs (Cys- Au NPs(ii)) were obtained by adding 30 μL L-cysteine into SO<sub>3</sub><sup>2-</sup>-Au NPs solution.

## 5. Fabrication of different Au NPs@Ab2

**SO<sub>3</sub><sup>2-</sup>-Au NPs@Ab2** 1 mL SO<sub>3</sub><sup>2-</sup>-Au NPs (0.5 mg·mL<sup>-1</sup>) were activated by the addition of EDC (100 μL, 20 mg·mL<sup>-1</sup>) and NHS solution (100 μL, 10 mg·mL<sup>-1</sup>). Subsequently, 2 mL of Ab2 solution (0.1 mg·mL<sup>-1</sup>) was added, shaken gently overnight at 4°C. After centrifugation and washing with PBS three times, the bioconjugates (SO<sub>3</sub><sup>2-</sup>-Au NPs@Ab2) were obtained by suspending in 2 mL of PBS (0.1 mol·L<sup>-1</sup>, pH 7.4), and then reserved at 4°C for subsequent use.

**Citrate-Au NPs@Ab2, Cys-Au NPs(i)@Ab2 and Cys-Au NPs(ii)@Ab2** They were obtained by similar experiment operations as the controls.

## 6. Immunoreaction and measurement procedure

All electrochemical measurements were carried out using three-electrode system at room temperature. EIS was used to study the preparation process of the BSA/anti-PSA/Ag<sub>2</sub>S/CuS/α-Fe<sub>2</sub>O<sub>3</sub>/GCE in 5 mmol·L<sup>-1</sup> [Fe(CN)<sub>6</sub>]<sup>3-/4-</sup>. CHI 440A electrochemical workstation configured external LED lamp with the output power about 14 mW·cm<sup>-2</sup> was invited to conduct PEC measurements of the proposed electrodes. The detection was carried in 5 mL PBS (0.1 mol·L<sup>-1</sup>, pH 7.4).

## 7. EIS performances of the stepwise modified electrodes

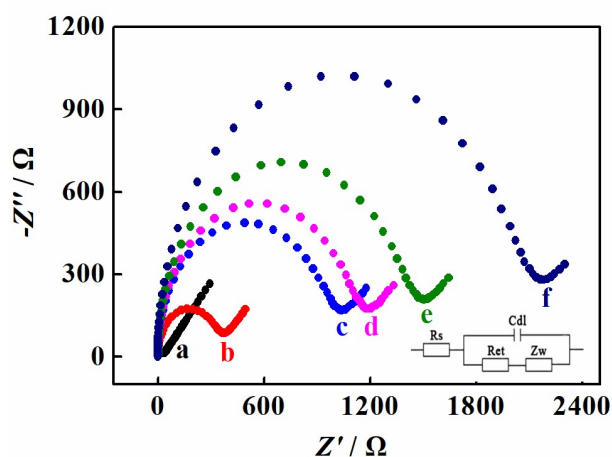

**Fig.S1.** Nyquist diagrams of EIS recorded from 0.01 Hz to 100 kHz for at (a) bare GCE, (b)  $\alpha$ -Fe<sub>2</sub>O<sub>3</sub>/GCE, (c) CuS/ $\alpha$ -Fe<sub>2</sub>O<sub>3</sub>/GCE, (d) Ag<sub>2</sub>S/CuS/ $\alpha$ -Fe<sub>2</sub>O<sub>3</sub>/GCE, (e) anti-PSA/Ag<sub>2</sub>S/CuS/ $\alpha$ -Fe<sub>2</sub>O<sub>3</sub>/GCE, (f) BSA/anti-PSA/Ag<sub>2</sub>S/CuS/ $\alpha$ -Fe<sub>2</sub>O<sub>3</sub>/GCE in 5 mL 5 mmol·L<sup>-1</sup> [Fe(CN)<sub>6</sub>]<sup>3-/4</sup> (pH 7.4).

## 8. The elemental mappings of n-p-n composite

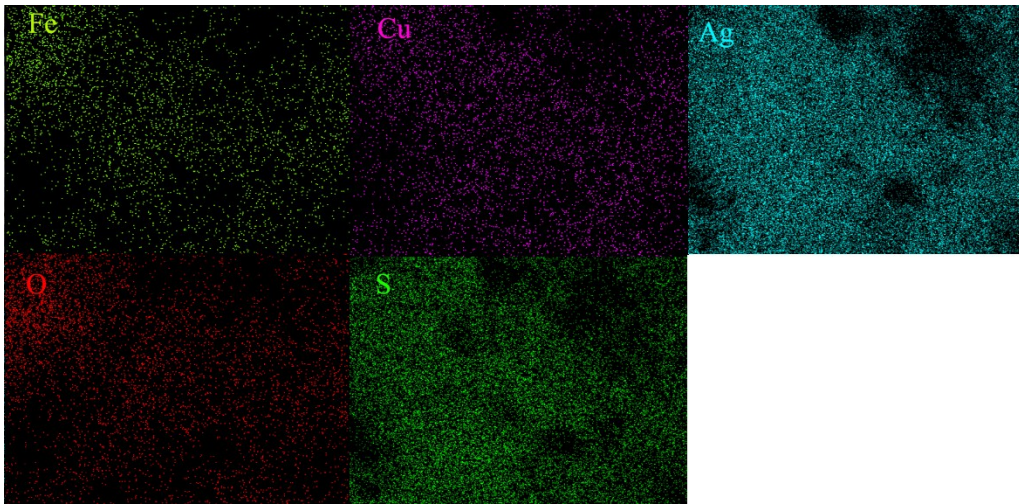

**Fig.S2.** The elemental mappings of Ag<sub>2</sub>S/CuS/ $\alpha$ -Fe<sub>2</sub>O<sub>3</sub> n-p-n composite.

## 9. FTIR and EDX Characteristics of different materials

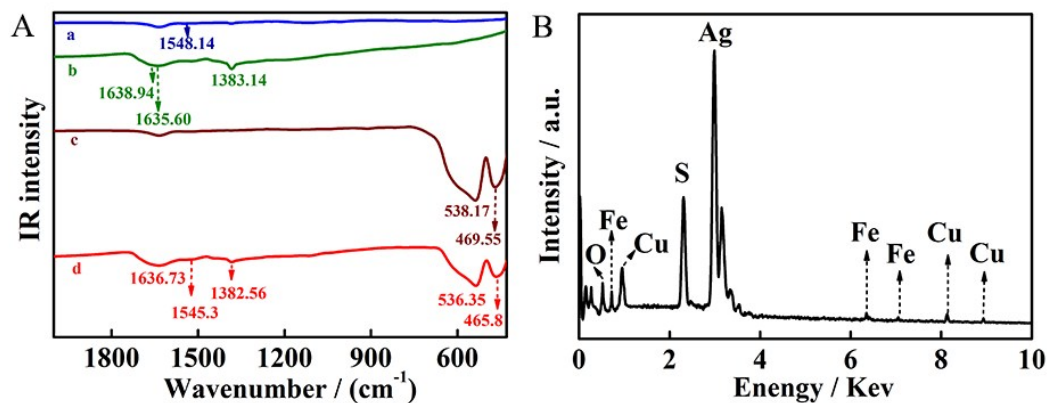

**Fig.S3.** (A) FTIR profiles of different materials (a) Ag<sub>2</sub>S, (b) CuS, (c)  $\alpha$ -Fe<sub>2</sub>O<sub>3</sub> and (d) Ag<sub>2</sub>S/CuS/ $\alpha$ -Fe<sub>2</sub>O<sub>3</sub>. (B) EDX spectrum of Ag<sub>2</sub>S/CuS/ $\alpha$ -Fe<sub>2</sub>O<sub>3</sub> film.

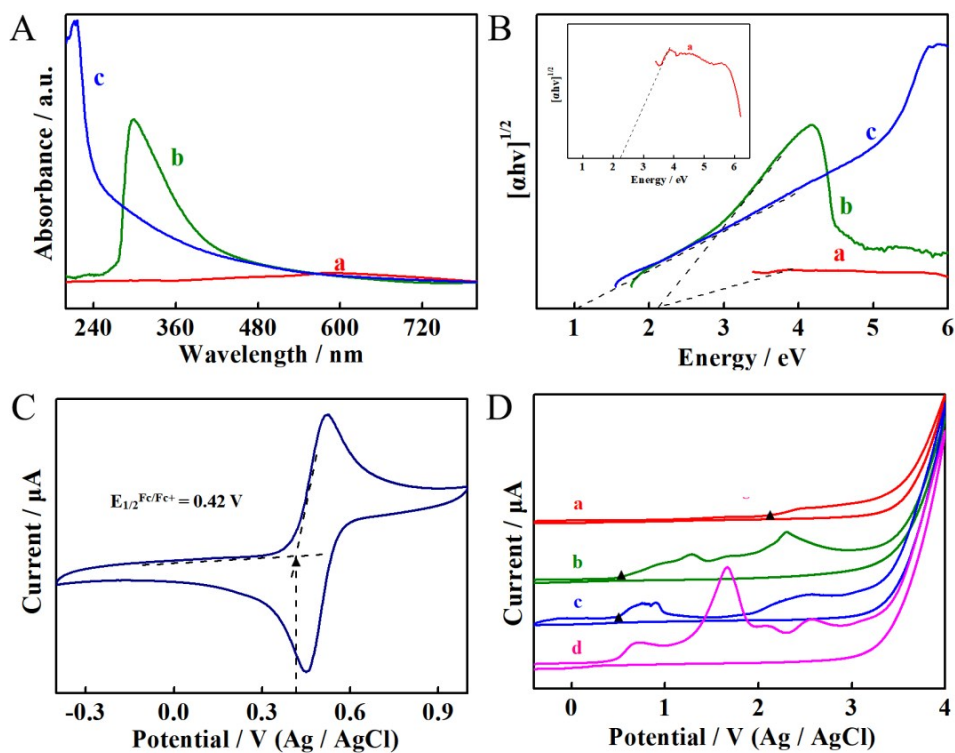

## 10. Band-gap determination of $\alpha$ -Fe<sub>2</sub>O<sub>3</sub>, CuS and Ag<sub>2</sub>S

**Fig.S4.** (A) UV-vis spectra and (B) Tauc plots of indirect transitions:  $\alpha$ -Fe<sub>2</sub>O<sub>3</sub>, CuS and Ag<sub>2</sub>S. (C) Cyclic voltammograms (CVs) of bare GCE in a deoxygenated anhydrous acetonitrile solution containing 0.10 mol·L<sup>-1</sup> tetrabutylammonium hexafluorophosphate (TBAPF<sub>6</sub>) and 0.5 mmol·L<sup>-1</sup> ferrocene (Fc) at a scan rate of 50 mV·s<sup>-1</sup>. (D) CVs of  $\alpha$ -Fe<sub>2</sub>O<sub>3</sub>/GCE, CuS/GCE, Ag<sub>2</sub>S/GCE, and Ag<sub>2</sub>S/CuS/ $\alpha$ -Fe<sub>2</sub>O<sub>3</sub>/GCE as the working electrodes in 0.10 mol·L<sup>-1</sup> TBAP<sub>6</sub> solutions in the same conditions at scan rate of 50 mV·s<sup>-1</sup>. E<sub>ox</sub> was calculated from tangents of the oxidation peaks of the species.

The energy band gaps of as-prepared Ag<sub>2</sub>S, CuS,  $\alpha$ -Fe<sub>2</sub>O<sub>3</sub> were obtained by equation 1:



$$\alpha h\nu = B(h\nu - E_g)^{n/2} \quad (1)$$

where  $\alpha$ ,  $h$  and  $\nu$  are absorption coefficient, Planck constant and light frequency, respectively;  $E_g$  and  $B$  are band gap energy and constant, respectively. Depending on being a direct or indirect band gap semiconductor, the  $n$  value is 1 or 4, respectively.<sup>4</sup> From the extrapolation of the linear part of the plot of  $(\alpha h\nu)^{(1/2)}$  versus  $(h\nu)$  (Fig. C) corresponding to each of the  $\text{Ag}_2\text{S}$ ,  $\text{CuS}$ ,  $\alpha\text{-Fe}_2\text{O}_3$ , their corresponding band gaps ( $E_g$ ) were determined to be 1.0, 2.2 and 2.2 eV, respectively.

The positions of the conduction band (CB) and valence band (VB) edges of the constituents of the  $\text{Ag}_2\text{S}/\text{GCE}$ ,  $\text{CuS}/\text{GCE}$ ,  $\alpha\text{-Fe}_2\text{O}_3/\text{GCE}$  were estimated by calculating their electron affinity (EA) and ionization potential (IP) by using the following equations (2-3).<sup>5</sup> The energy levels of them can be gained by counting its lowest unoccupied molecular orbital (LUMO) and highest occupied molecular orbital (HOMO) by using the equations (4-5).

$$\text{IP} = - (4.80 - E_{1/2}^{\text{Fc}/\text{Fc}^+} + E_{\text{ox}}) \quad (2)$$

$$\text{EA} = \text{IP} + E_g \quad (3)$$

$$E_{\text{HOMO}} = - (4.80 - E_{1/2}^{\text{Fc}/\text{Fc}^+} + E_{\text{ox}}) \quad (4)$$

$$E_{\text{LUMO}} = E_{\text{HOMO}} + E_g \quad (5)$$

$E_{1/2}^{\text{Fc}/\text{Fc}^+}$  is the formal potential of  $\text{Fc}/\text{Fc}^+$ ,  $E_{\text{ox}}$  is the oxidation initiation potential. Potentials were calibrated with the ferrocene/ferrocenium ( $\text{Fc}/\text{Fc}^+$ ) couple, and the potential of  $\text{Fc}/\text{Fc}^+$  had an absolute energy level of 4.80 eV to vacuum. As shown in Fig. S3c,  $E_{1/2}^{\text{Fc}/\text{Fc}^+}$  was located at +0.42 V, with the use of bare GCE and scan rate of  $50 \text{ mV} \cdot \text{s}^{-1}$  in  $0.5 \text{ mmol} \cdot \text{L}^{-1}$   $\text{Fc}$  solution. The CB/VB was thus determined as  $-4.38 \text{ eV}/-6.58 \text{ eV}$  for  $\alpha\text{-Fe}_2\text{O}_3$ ,  $-2.76 \text{ eV}/-4.96 \text{ eV}$  for  $\text{CuS}$ , and  $-3.93 \text{ eV}/-4.93 \text{ eV}$  for  $\text{Ag}_2\text{S}$ . These values

would be helpful for understanding the PEC behaviors of the designed n-p-n heterojunctions.

## 11. Optimization experiments

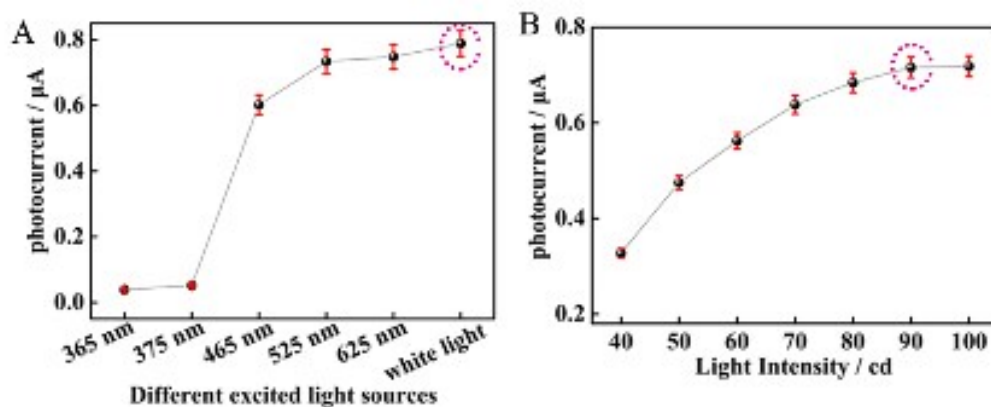

**Fig.S5.** PEC signal of immunosensors under the different wavelengths of excitation lights (A) and the white light intensity (B).

## 12. PEC signal of different sensors immune responses

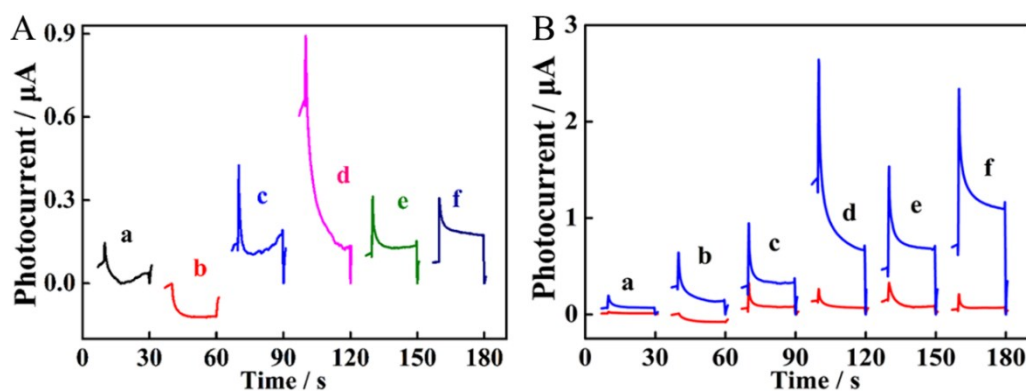

**Fig.S6.** (A) PEC signal of (a)  $\alpha\text{-Fe}_2\text{O}_3$ , (b) CuS, (c)  $\text{Ag}_2\text{S}$ , (d)  $\text{CuS}/\alpha\text{-Fe}_2\text{O}_3$ , (e)  $\text{Ag}_2\text{S}/\text{CuS}$  and (f)  $\text{Ag}_2\text{S}/\text{CuS}/\alpha\text{-Fe}_2\text{O}_3$  modified on the GCE in PBS solution. (B) The PEC

immunosensor made from (a) BSA/anti-PSA/ $\alpha$ -Fe<sub>2</sub>O<sub>3</sub>/GCE, (b) BSA/anti-PSA/CuS/GCE, (c) BSA/anti-PSA/Ag<sub>2</sub>S/GCE, (d) BSA/anti-PSA/CuS/ $\alpha$ -Fe<sub>2</sub>O<sub>3</sub>/GCE, (e) BSA/anti-PSA/Ag<sub>2</sub>S/CuS/GCE and (f) BSA/anti-PSA/Ag<sub>2</sub>S/CuS/ $\alpha$ -Fe<sub>2</sub>O<sub>3</sub>/GCE.

**Table S1.** PEC responses of different immunosensors before and after immune reaction in PBS solution

| Immunosensors                                                                     | I(blank)<br>(/ $\mu$ A) | I(1ng·mL <sup>-1</sup> PSA)<br>(/ $\mu$ A) | I(1ng·mL <sup>-1</sup> PSA)/<br>I(blank) |
|-----------------------------------------------------------------------------------|-------------------------|--------------------------------------------|------------------------------------------|
| BSA/anti-PSA/ $\alpha$ -Fe <sub>2</sub> O <sub>3</sub> /GCE                       | 0.0124                  | 0.0692                                     | 5.60                                     |
| BSA/anti-PSA/CuS/GCE                                                              | -0.0041                 | 0.141                                      | -                                        |
| BSA/anti-PSA/Ag <sub>2</sub> S/GCE                                                | 0.0803                  | 0.331                                      | 4.13                                     |
| BSA/anti-PSA/CuS/ $\alpha$ -Fe <sub>2</sub> O <sub>3</sub> /GCE                   | 0.0692                  | 0.668                                      | 9.68                                     |
| BSA/anti-PSA/Ag <sub>2</sub> S/CuS/GCE                                            | 0.0871                  | 0.703                                      | 8.05                                     |
| BSA/anti-PSA/Ag <sub>2</sub> S/CuS/ $\alpha$ -Fe <sub>2</sub> O <sub>3</sub> /GCE | 0.0714                  | 1.102                                      | 15.41                                    |

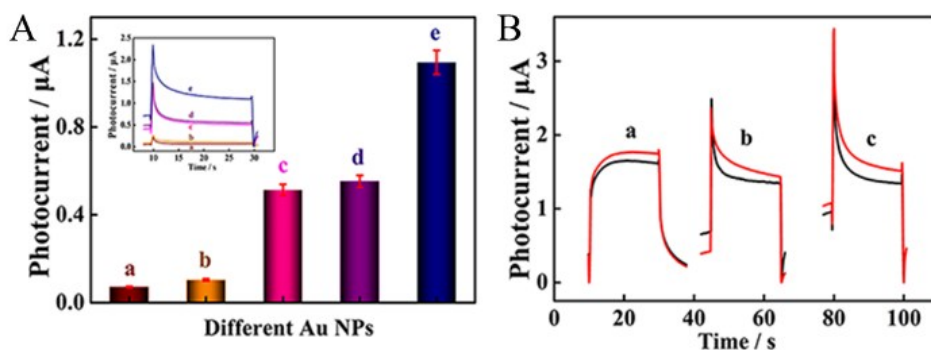

**Fig.S7.** (A) photoelectric self-enhancement of different Au NPs@Ab2 towards 1ng·mL<sup>-1</sup> PSA: (a) blank, (b) Citrate-AuNPs, (c) Cys-AuNPs(i), (d) Cys-Au NPs(ii), (e) SO<sub>3</sub><sup>2-</sup>-Au NPs. (B) PEC signals of SO<sub>3</sub><sup>2-</sup>-Au NPs@Ab2 in 1ng·mL<sup>-1</sup> PSA (0.1mol·L<sup>-1</sup> PBS, pH 7.4) with addition 10 mmol·L<sup>-1</sup> (a) L-cysteine, (b) AA and (c) sodium sulfite.

### 13. Selectivity of the PEC immunosensors

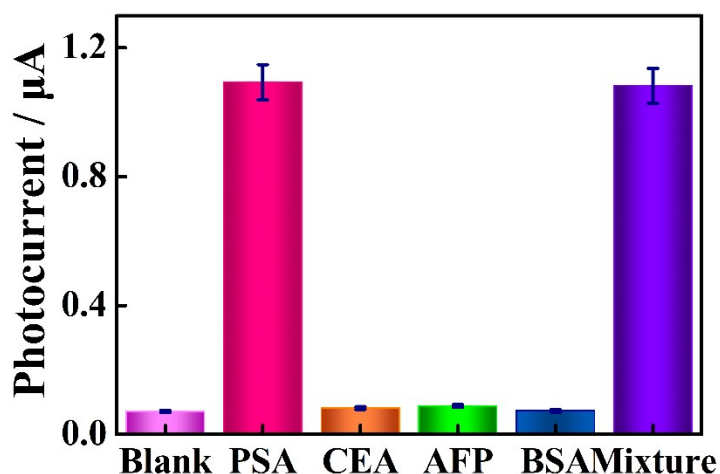

**Fig.S8.** Selectivity of the PEC immunosensor in blank, PSA, CEA, AFP, 1wt.% BSA and the mixture (PSA, CEA, AFP and 1wt.% BSA) respectively, the concentrations are all  $1.0 \text{ pg}\cdot\text{mL}^{-1}$

#### 14. Detection of PSA in diluted human serum samples.

The applicability of the designed biosensors had been assessed for real samples. Before testing, the healthy human serum samples were centrifuged, and the supernatant was diluted 50 times ( $0.1 \text{ mol}\cdot\text{L}^{-1}$  PBS, pH 7.4). The standard addition method was used to measure the different concentrations of PSA. It obtains acceptable performance in real samples for the spike recoveries ranged from 98.7% to 100.4% (table S2).

**Table S2.** Recovery tests for PSA in human serum samples (n=6)

| Sample number | Added ( $\text{fg}\cdot\text{mL}^{-1}$ ) | Found ( $\text{fg}\cdot\text{mL}^{-1}$ ) | Recovery (%) |
|---------------|------------------------------------------|------------------------------------------|--------------|
| 1             | 15.0                                     | 14.8                                     | 98.7         |
| 2             | 85.0                                     | 85.2                                     | 100.2        |
| 3             | 600.0                                    | 602.5                                    | 100.4        |

## 15. Stability of the PEC immunosensor

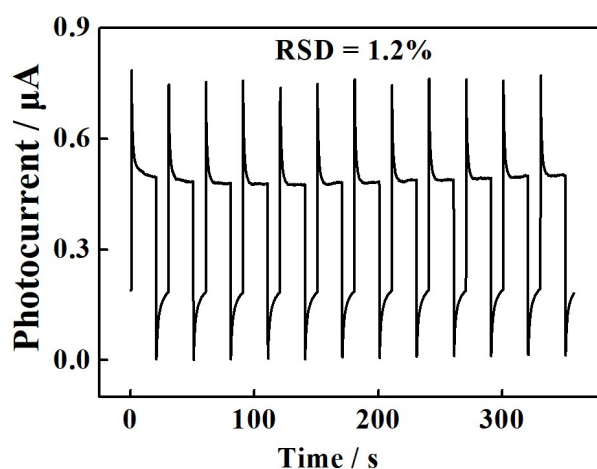

**Fig.S9.** Stability of the PEC immunosensor in  $100 \text{ fg}\cdot\text{mL}^{-1}$  PSA.

## 16. Comparison of various methods for PSA activity assay

**Table S3.** Comparison of various methods for PSA activity assay

| Methods                           | Linear range<br>( $\text{ng}\cdot\text{mL}^{-1}$ ) | Detection limit<br>( $\text{fg}\cdot\text{mL}^{-1}$ ) | References |
|-----------------------------------|----------------------------------------------------|-------------------------------------------------------|------------|
| Fluorescence                      | $2.0\times 10^{-1}$ – $1.2\times 10$               | $6.0\times 10^4$                                      | 6          |
| Fluorescence                      | $1.0\times 10^{-4}$ – $1.0\times 10^{-1}$          | $3.0\times 10$                                        | 7          |
| Electrochemiluminescence          | $1.0\times 10^{-2}$ – $5.0\times 10$               | $3.0\times 10^3$                                      | 8          |
| Differential pulse voltammetric   | $2.0\times 10^{-3}$ – $4.0\times 10$               | $1.0\times 10^3$                                      | 9          |
| Field-effect transistor           | $1.0\times 10^{-1}$ – $1.0$                        | $1.0\times 10^2$                                      | 10         |
| Surface-enhanced Raman scattering | $1.0\times 10^{-3}$ – $1.0\times 10^3$             | $1.1\times 10^2$                                      | 11         |
| Photoelectrochemical              | $1.0\times 10^{-2}$ – $5.0\times 10$               | $1.5\times 10^3$                                      | 12         |
| Photoelectrochemical              | $5.0\times 10^{-4}$ – $1.0\times 10$               | $2.9\times 10^2$                                      | 13         |
| Photoelectrochemical              | $1.0\times 10^{-5}$ – $1.0\times 10$               | 3.3                                                   | This work  |

## 17. References

1. G. Mathew, P. Dey , R. Das , S. D. Chowdhury, M. P. Das , P. Veluswamy , B. Neppolian, J. Das, *Biosens. Bioelectron.*, 2018, **115**, 53–60.
2. R. Tang, Y. Chai, X. Liu, L. Li, L. Yang, P. Liu, Y. Zhou ,H. Ju, Y. Cheng, *Biosens. Bioelectron.*, 2018, **117**, 224–231.
3. H. Zhou, T. Han, Q. Wei, S. Zhang, *Anal. Chem.*, 2016, **88**, 2976–2983.
4. S. Zhu, X. Lin, P. Ran, Q. Xia, C. Cheng, Y. J. Ma, Y. Fu, *Biosens. Bioelectron.*, 2017, **91**, 436-440.
5. Q. Wang, Y. F. Ruan, W. W. Zhao, P. Lin, J. J. Xu, and H. Y. Chen, *Anal. Chem.*, 2018, **90**, 3759–3765.
6. T. Edvinsson, *R. Soc. open sci.*, 2018, **5** (9), 180387.
7. B. Zhang, W. Gao, J. Piao, Y. Xiao, B. Wang, W. Peng, X. Gong, Z. Wang, H. Yang, and J. Chang, *ACS Appl. Mater. Inter.*, 2018, **10** (17), 14549-14558.
8. P. Hu, X. Wang, L. Wei, R. Dai, X. Yuan, K. Huang and P. Chen, *J. Mater. Chem. B*, 2019, **7** (31), 4778-4783 .
9. J. T. Cao, Y. L. Wang, J. J. Zhang, Y. X. Dong, F. R. Liu, S. W. Ren, Y. M. Liu, *Anal. Chem.*, 2018, **90** (17), 10334-10339.
10. X. Zheng, L. Li, K. Cui, Y. Zhang, L. Zhang, S. Ge, and J. Yu, *ACS Appl. Mater. Inter.*, 2018, **10** (4), 3333-3340
11. H. Park, G. Han, S. W. Lee, H. Lee, S. H. Jeong, M. Naqi, A. A. AlMutairi, Y. J. Kim, J. Lee, W. Kim, S. Kim, Y. Yoon, and G. Yoo, *ACS Appl. Mater. Inter.*, 2017, **9** (50), 43490-43497

12. H. Chang, H. Kang, E. Ko, B. H. Jun, H. Y. Lee, Y. S. Lee, D. H. Jeong, *ACS Sens.*, 2016, **1** (6), 645-649.
13. S. Lv, K. Zhang, Y. Zeng, D. Tang, *Anal. Chem.*, 2018, **90** (11), 7086-7093.
14. Y. Zang, Y. Ju, J. Jiang, Q. Xu, M. Chu and H. Xue, *Analyst*, 2019, **144**, 4661–4666.
